# Supplementary material for: Ética empresarial y códigos de conducta
Source: PLOS journal article supplement (doi:10.1371/journal.pgen.1002592), 1995-01-01
Supplement: S7 (10.1371/journal.pgen.1002592.s007) [file journal.pgen.1002592.s007]

| <b>Supplementary Table 3: Dysregulated genes of young autistic cases and previously identified candidate genes and loci</b> |                 |                 |                                                                    |                                                                                                                                                                 |
|-----------------------------------------------------------------------------------------------------------------------------|-----------------|-----------------|--------------------------------------------------------------------|-----------------------------------------------------------------------------------------------------------------------------------------------------------------|
| <b>Gene Symbol</b>                                                                                                          | <b>Probe ID</b> | <b>Cytoband</b> | <b>Locus Linkage/ Association/CNV</b>                              | <b>Genes near locus</b>                                                                                                                                         |
| C10orf10                                                                                                                    | ILMN_1767556    | 10q11.21c       | Trikalinos et al., 2006                                            |                                                                                                                                                                 |
| RASD1                                                                                                                       | ILMN_1740426    | 17p11.2g        | Trikalinos et al., 2006                                            | OMG on 17q11.2 (Martin et al., 2007); SLC6A4 (Cook 1997, Yirmiya et al., 2001, Kim et al., 2002 and Sutcliffe et al., 2005)                                     |
| IL4R                                                                                                                        | ILMN_1652185    | 16p12.1a        | Risch et al., 1999; Yang and Gill, 2007; Kumar and Christian, 2009 | GRIN2A and ABAT are on 16p11-13 (Barnby et al., 2005)                                                                                                           |
| MPP7                                                                                                                        | ILMN_1721774    | 10p11.23c       | Lauritsen et al., 2006                                             |                                                                                                                                                                 |
| ALOX12B                                                                                                                     | ILMN_1692332    | 17p13.1c        | Risch et al., 1999                                                 |                                                                                                                                                                 |
| SYN3                                                                                                                        | ILMN_2282019    | 22q12.3a        | IMGSAC 1998                                                        |                                                                                                                                                                 |
| FLJ31568                                                                                                                    | ILMN_2113728    | 22q11.23a       | Itsara et al., 2009                                                |                                                                                                                                                                 |
| NOD1                                                                                                                        | ILMN_2114422    | 7p15.1b         |                                                                    | HOXA1 is on 7p15.3 (POSITIVE: Ingram et al., 2000; NEGATIVE: Li et al., 2002)                                                                                   |
| OR2M7                                                                                                                       | ILMN_1655713    | 1q44f           | Risch et al., 1999                                                 |                                                                                                                                                                 |
| POU6F2                                                                                                                      | ILMN_1773914    | 7p14.1d         | Anney et al., 2010                                                 |                                                                                                                                                                 |
| CMAH                                                                                                                        | ILMN_2086612    | 6p21.32         |                                                                    | HLA-A is on 6p21.3 (Torres 2006); HLA-DRB1 (Torres 2002* and Warren 1996); GRIK2 (Jamain 2002 and Shuang 2004); GLO1 (Junaid 2004); NEGATIVE: HLA (Stubbs 1980) |
| SCN7A                                                                                                                       | ILMN_1773271    | 2q24.3d         | Philippe et al., 1999; Segurado et al., 2005                       | NEGATIVE: CMYA3 2q24.3 (Blasi 2006); POSITIVE SLC25A12 is on 2q24 (Freitag 2007, Silverman 2008)                                                                |
| CERKL                                                                                                                       | ILMN_1808810    | 2q31.3b         | IMGSAC 2001; Lauritsen et al., 2006                                |                                                                                                                                                                 |
| FOSL2                                                                                                                       | ILMN_1725175    | 2p23.2b         | Ronald et al., 2009                                                |                                                                                                                                                                 |
| CUGBP2                                                                                                                      | ILMN_1664170    | 10p14b-p14a     | Buxbaum 2004, Risch et al., 1999                                   |                                                                                                                                                                 |
| NAMPT                                                                                                                       | ILMN_1753111    | 7q22.2c         | Trikalinos et al., 2006                                            | FOXP2, RELN, PTPRZ1, NRCAM, WNT2, HOXA1 are on 7q22-36 (Persico et al., 2001; Serajee et al., 2006; Skaar et al., 2005; Freitag et al., 2010)                   |
| FLJ14107                                                                                                                    | ILMN_1811608    | 8p21.3          | IMGSAC 1998                                                        |                                                                                                                                                                 |
| MAP4K1                                                                                                                      | ILMN_2365111    | 19q13.2a        |                                                                    | NEGATIVE: APOE on 19q13.2 (Raiford 2004)                                                                                                                        |
| FAS                                                                                                                         | ILMN_2319077    | 10q23.31b       | Buxbaum et al., 2004                                               | PTEN is on 10q23.31 (Butler 2005; Herman et al., 2007)                                                                                                          |
| WNT3                                                                                                                        | ILMN_1803593    | 17q21.32a       | Cantor et al., 2005; Kumar and Christian 2009                      |                                                                                                                                                                 |

|         |              |                     |                                                                               |                                                                                                                        |
|---------|--------------|---------------------|-------------------------------------------------------------------------------|------------------------------------------------------------------------------------------------------------------------|
| TMEM63C | ILMN_1792094 | 14q24.3c            | Lauritsen et al., 2006                                                        |                                                                                                                        |
| NTRK3   | ILMN_1687967 | 15q25.3d            | Szatmari et al., 2007                                                         |                                                                                                                        |
| CHTF18  | ILMN_1756705 | 16p13.3f            | Kumar and Christian 2009;<br>Risch et al.,1999; Lauritsen<br>et al.,2006      |                                                                                                                        |
| CHP2    | ILMN_1695631 | 16p12.1b            | Risch et al., 1999; Yang and<br>Gill, 2007; Kumar and<br>Christian, 2009      |                                                                                                                        |
| SLC28A1 | ILMN_1815165 | 15q25.3a            | Szatmari et al., 2007                                                         |                                                                                                                        |
| C3orf45 | ILMN_1775136 | 3p21.31b            | Ylisaikko-oja et al., 2006;<br>Rehnstrom et al., 2006;<br>Stuart et al., 2007 |                                                                                                                        |
| KCNK2   | ILMN_2277334 | 1q41a               | Maussion et al., 2008                                                         |                                                                                                                        |
| NODAL   | ILMN_1712537 | 10q22.1b            |                                                                               | EGR2 is on 10q21.2-q22.1 (Swanberg<br>et al., 2009)                                                                    |
| PRSSL1  | ILMN_1673605 | 19p13.3j            | Philippe et al., 1999                                                         |                                                                                                                        |
| STH     | ILMN_1665311 | 17q21.31e           | Cantor et al., 2005; Kumar<br>and Christian 2009                              |                                                                                                                        |
| ABCB8   | ILMN_2102422 | 7q36.1d             | Molloy et al., 2005                                                           | CNTNAP2 7q26-q36 (Arking 2008;<br>Bakkaloglu et al., 2008), EN2 is on<br>7q36 (Brune 2008; Freitag 2007;<br>Wang 2008) |
| BRCA1   | ILMN_2311089 | 17q21.31a           | Cantor et al., 2005; Kumar<br>and Christian 2009                              | ITGB3 and HOXB1 on 17q21.3<br>(Ingram 2000)                                                                            |
| LCN10   | ILMN_1688646 | 9q34.3e             |                                                                               | DBH on 9q34 (Robinson et al., 2001)                                                                                    |
| NDE1    | ILMN_1739805 | 16p13.11b-          | Kumar and Christian, 2009                                                     |                                                                                                                        |
| TRIOBP  | ILMN_2370588 | 22q13.1a            | Durand et al., 2007                                                           | SHANK3 is on 22q13.3 (Moessner et<br>al., 2007)                                                                        |
| DLX4    | ILMN_1750941 | 17q21.33a           | Cantor et al., 2005; Kumar<br>and Christian, 2009                             |                                                                                                                        |
| ZNF200  | ILMN_1761965 | 16p13.3c            | Kumar and Christian, 2009;<br>Risch et al.,1999; Lauritsen<br>et al., 2006    | TSC2 is on 16p13.3 (Kumar and<br>Christian, 2009)                                                                      |
| KCNH8   | ILMN_1775348 | 3p24.3c             |                                                                               | OXTR is on 3p24-26 (Jacob 2007;<br>Lerer 2007; Wu 2005)                                                                |
| NHLH2   | ILMN_2208777 | 1p13.1d             | Risch et al., 1999; Auranen<br>et al 2002, 2000                               |                                                                                                                        |
| QDPR    | ILMN_1672443 | 4p15.32b            |                                                                               | DRD5 on 4p16.1-p15.3 (Philippe et al<br>2002)                                                                          |
| GREM1   | ILMN_2124585 | 15q13.3c-<br>q13.3d | Miller et al., 2008;<br>Pagnamenta et al., 2008;<br>Ben-Shacher et al., 2009  |                                                                                                                        |
| GPR62   | ILMN_1756807 | 3p21.1e             | Ylisaikko-oja et al., 2004;<br>Rehnstrom et al., 2006                         |                                                                                                                        |

|         |              |          |                                     |                                                                                                          |
|---------|--------------|----------|-------------------------------------|----------------------------------------------------------------------------------------------------------|
| CHRM5   | ILMN_1746646 | 15q14a   | Lauritsen et al., 2006              |                                                                                                          |
| SLCO1A2 | ILMN_1720727 | 12p12.1e | McCauley et al., 2005               |                                                                                                          |
| TSC22D3 | ILMN_1781356 | Xq22.3b  | Jamain et al., 2003                 | NLGN4 is on Xp22.33 (Jamain et al., 2003)                                                                |
| HOXD1   | ILMN_1717381 | 2q31.1h  | IMGSAC 2001; Lauritsen et al., 2006 | NEGATIVE: 2q21-q33 (Bacchelli 2003) including DLX2, TBR1, GAD1, DLX1, RAPGEF, CHN1, ATF2, HOXD1, NEUROD1 |
